# Supplementary figures and images for: NECTIN4 (PVRL4) as Putative Therapeutic Target for a Specific Subtype of High Grade Serous Ovarian Cancer—An Integrative Multi-Omics Approach
Source: MDPI journal article supplement (doi:10.3390/cancers11050698), 2019-05-20

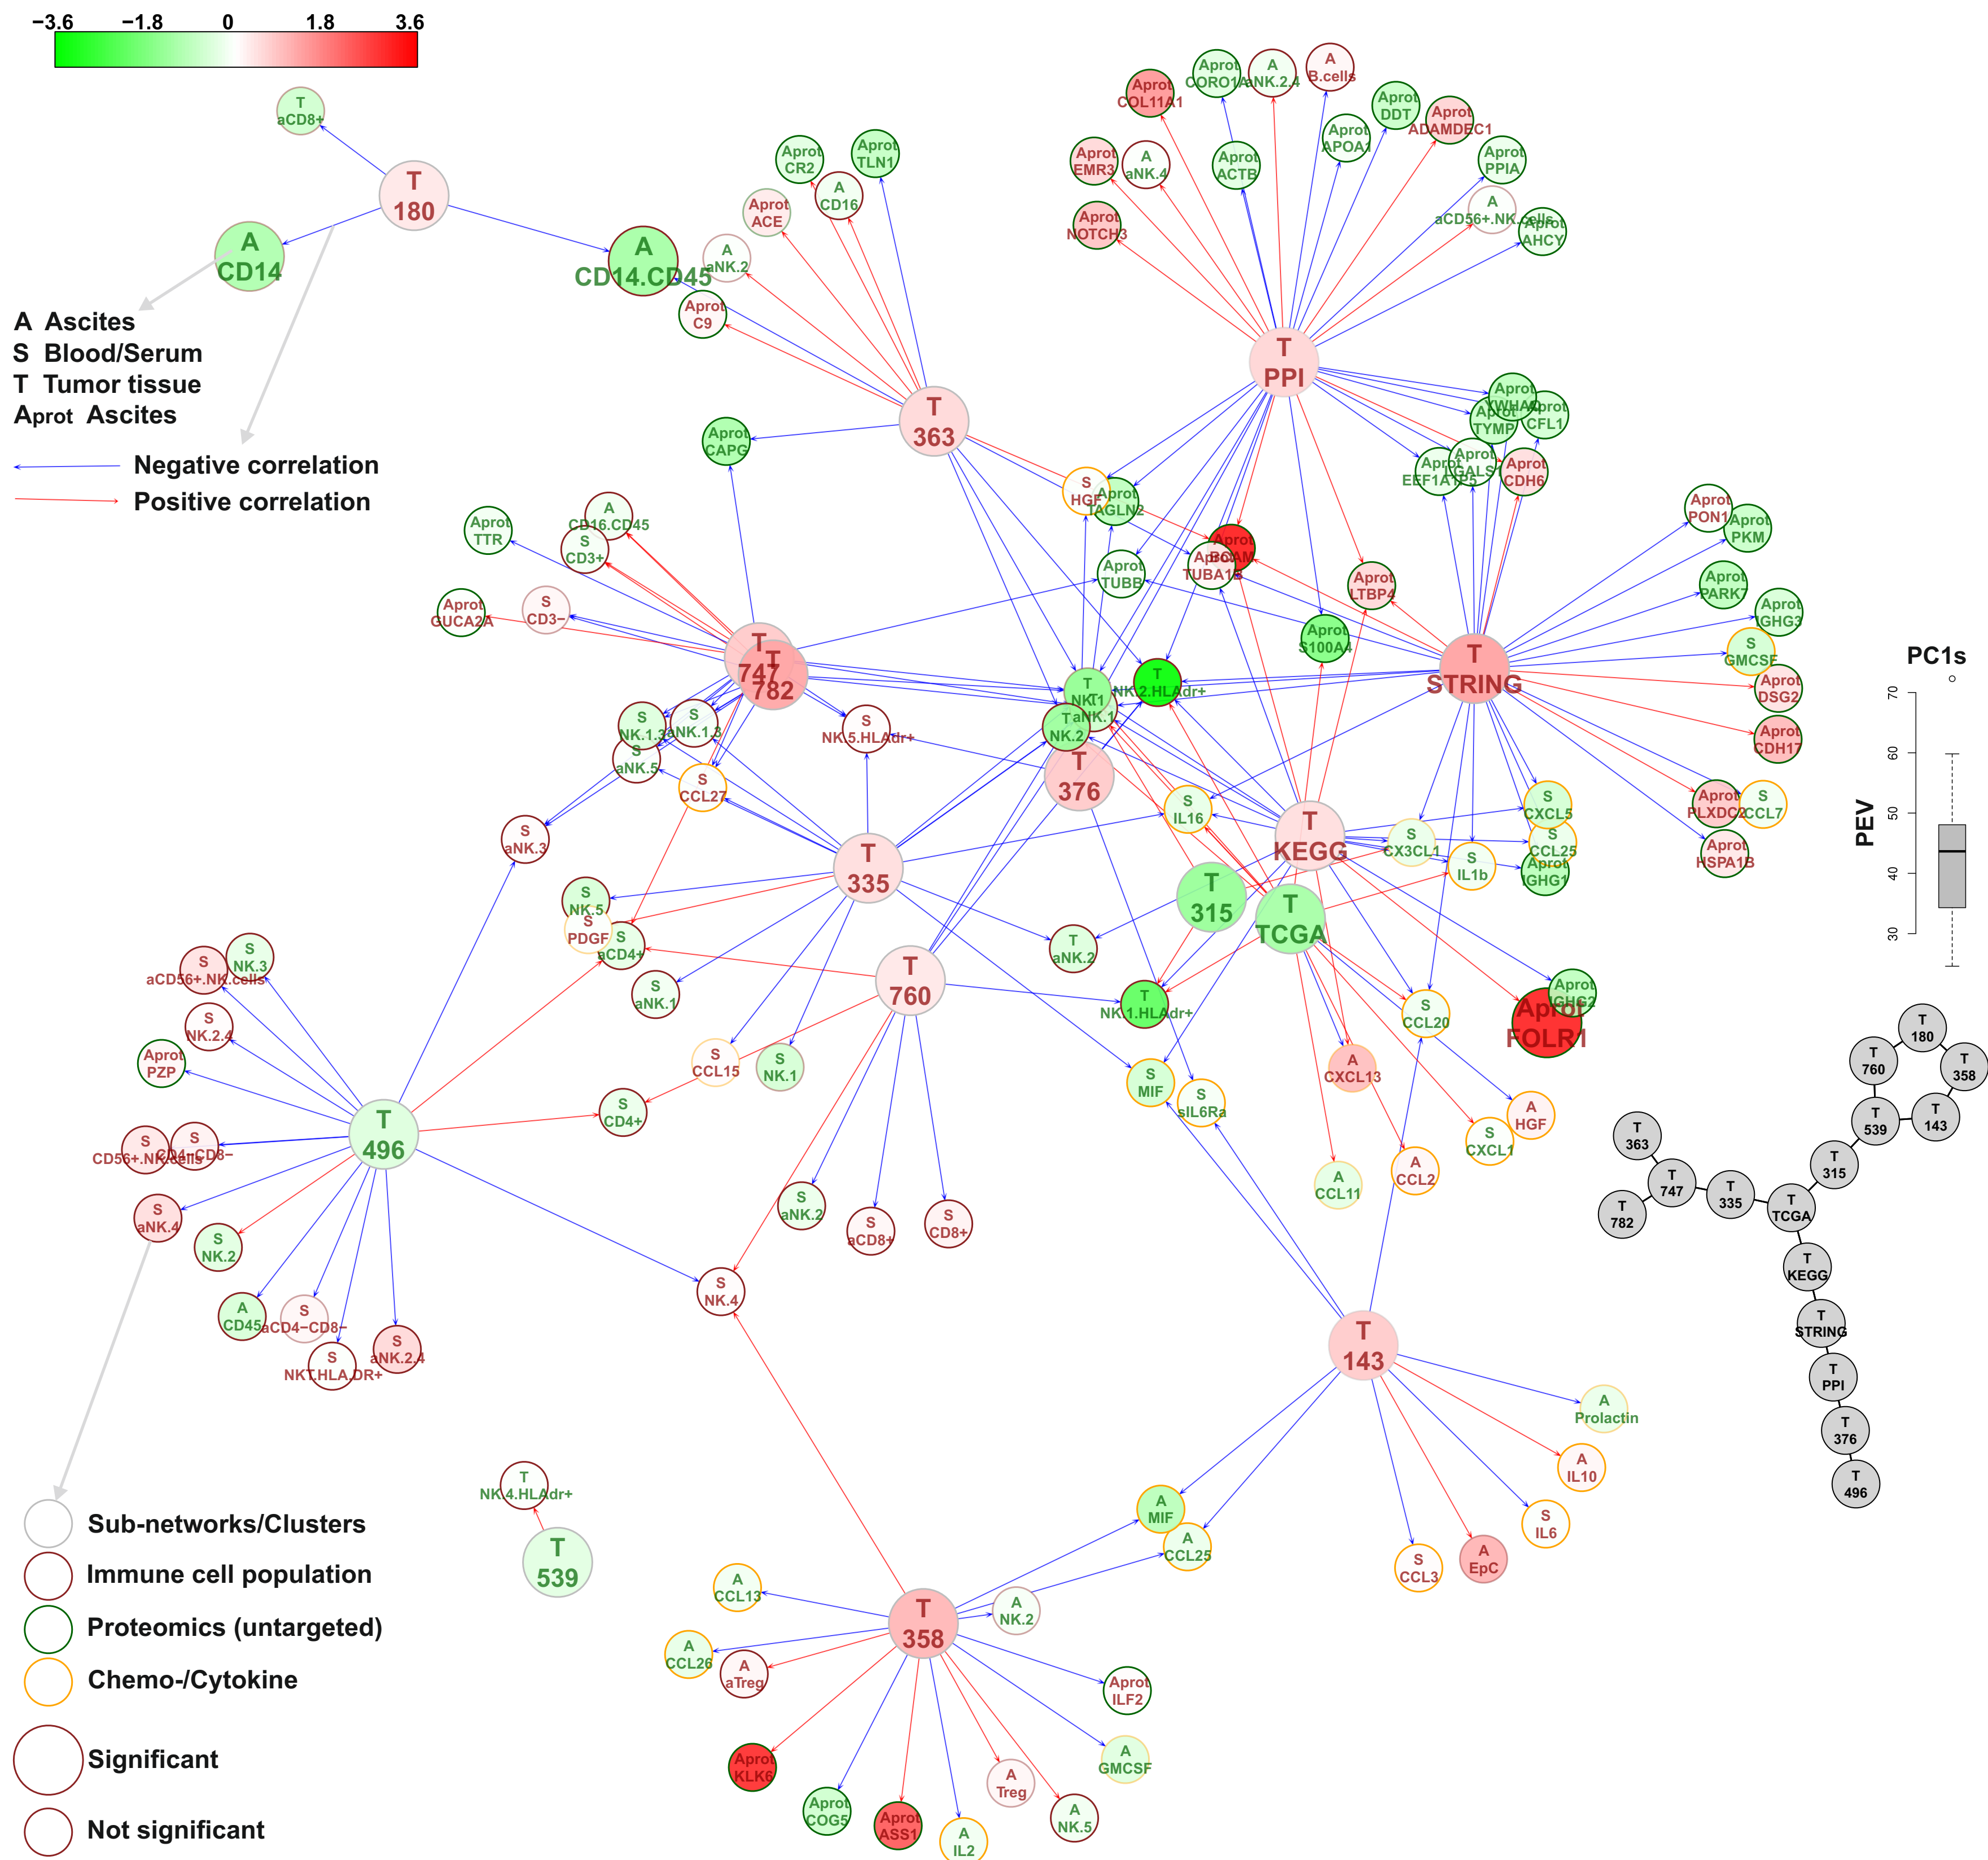

Supplement: s1 [file s1]
